# Supplementary material for: Investigation on the interconversion from DMF-solvated to unsolvated copper(ii) pyrazolate coordination polymers
Source: Royal Society of Chemistry journal article supplement (doi:10.1039/d0ce00370k), 2020-01-01
Supplement: d0ce00370k1.pdf [file d0ce00370k1.pdf]

Supporting Information for:

# **Investigation on the Interconversion from DMF Solvated to Unsolvated Copper(II) Pyrazolate Coordination Polymers**

*Corrado Di Nicola,<sup>a,\*</sup> Alessia Tombesi,<sup>a</sup> Marco Moroni,<sup>b</sup> Rebecca Vismara,<sup>b</sup> Fabio Marchetti,<sup>a</sup>  
Riccardo Pettinari,<sup>c</sup> Luca Nardo,<sup>b</sup> Guglielmo Vesco,<sup>b</sup> Simona Galli,<sup>b,\*</sup> Silvia Casassa,<sup>d</sup>  
Luciano Pandolfo,<sup>e,\*</sup> Claudio Pettinari<sup>c</sup>*

<sup>a</sup> School of Science and Technology, University of Camerino Via S. Agostino 1, 62032 Camerino (MC), Italy.

<sup>b</sup> Dipartimento di Scienza e Alta Tecnologia, Università dell'Insubria, Via Valleggio 11, 22100 Como, Italy.

<sup>c</sup> School of Pharmacy, University of Camerino, Via S. Agostino 1, 62032 Camerino (MC), Italy.

<sup>d</sup> Department of Chemistry, University of Turin, and Nanostructured Interfaces and Surfaces Center of Excellence, Via P. Giuria 5, 10125 Torino, Italy.

<sup>e</sup> Department of Chemical Sciences, University of Padova, Via Marzolo 1, 35131 Padova, Italy.

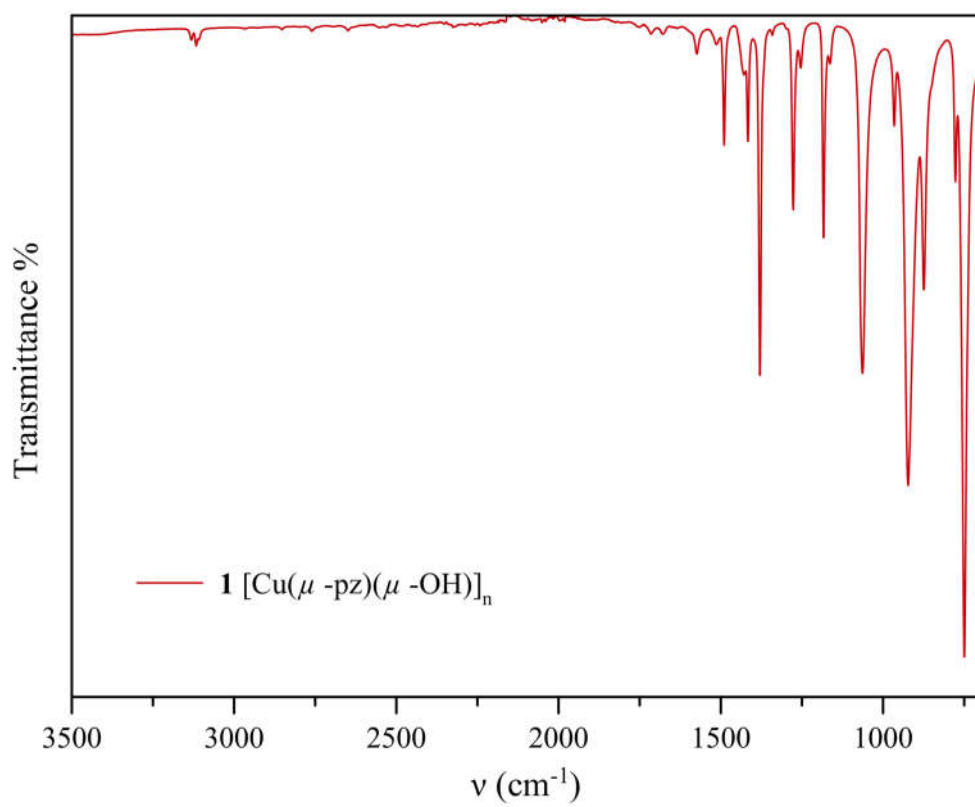

**Figure S1.** IR spectrum of  $[\text{Cu}(\mu\text{-pz})(\mu\text{-OH})]_n$  (**1**).

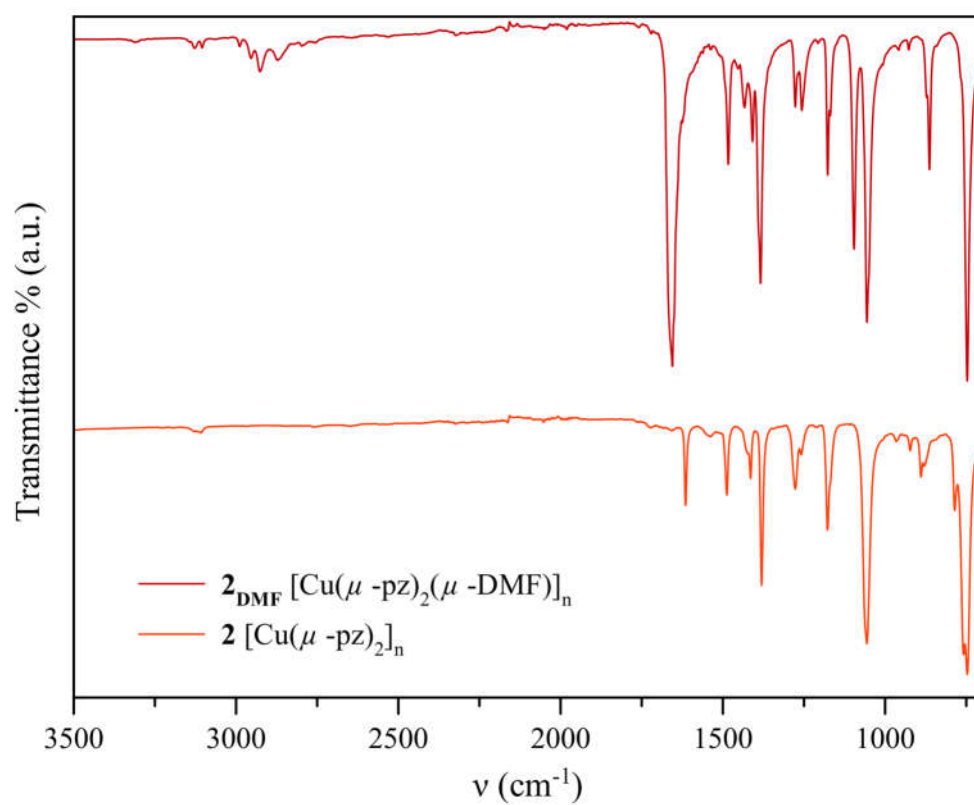

**Figure S2.** IR spectra of compounds  $[\text{Cu}(\mu\text{-pz})_2(\mu\text{-DMF})]_n$  ( $2_{\text{DMF}}$ , dark red) and  $[\text{Cu}(\mu\text{-pz})_2]_n$  (**2**, red).

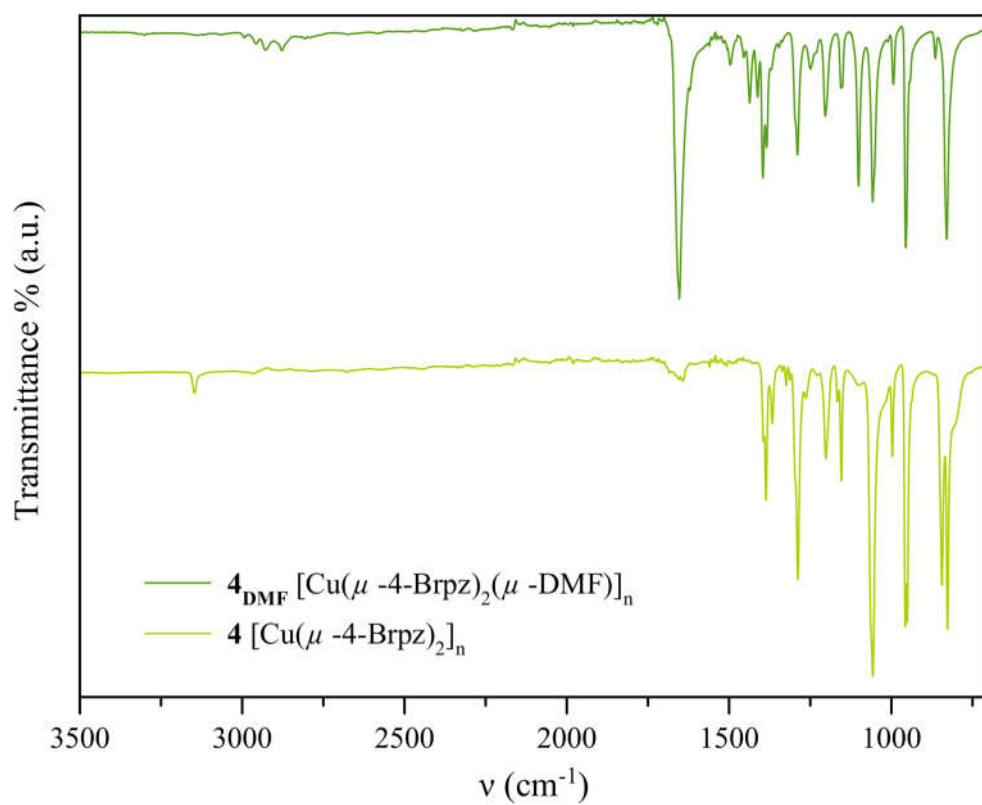

**Figure S3.** IR spectra of compounds  $[\text{Cu}(\mu\text{-4-Brpz})_2(\mu\text{-DMF})]_n$  (**4<sub>DMF</sub>**, green) and  $[\text{Cu}(\mu\text{-4-Brpz})_2]_n$  (**4**, light green).

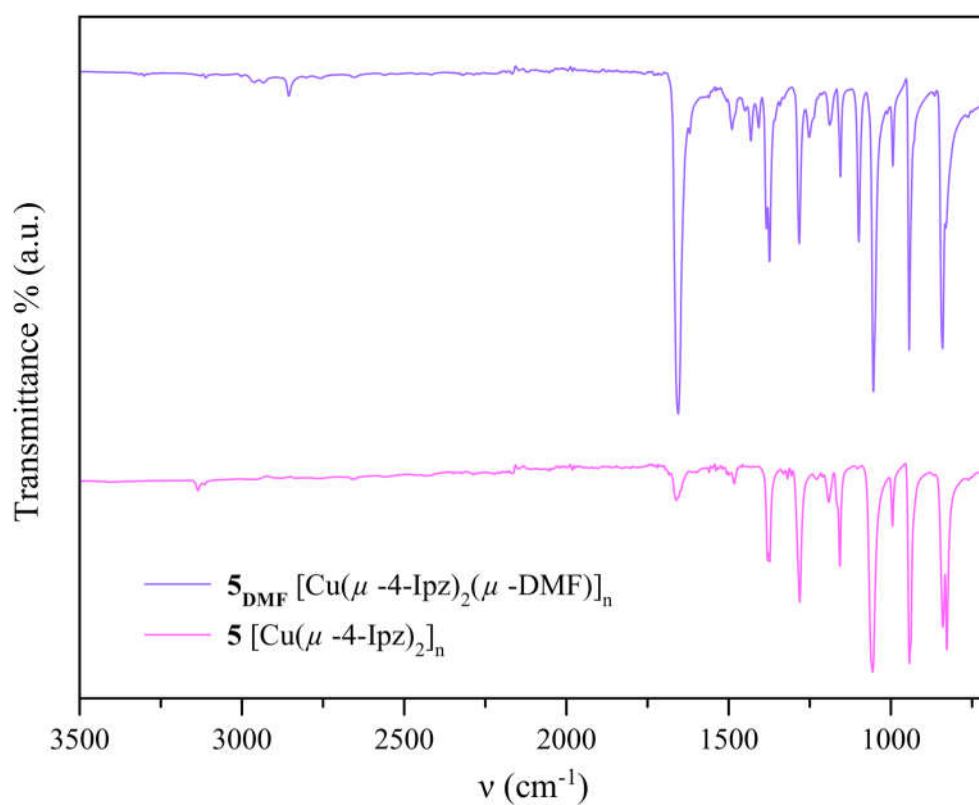

**Figure S4.** IR spectra of compounds  $[\text{Cu}(\mu\text{-4-Ipz})_2(\mu\text{-DMF})]_n$  ( $\text{5}_{\text{DMF}}$ , violet) and  $[\text{Cu}(\mu\text{-4-Ipz})_2]_n$  ( $\text{5}$ , fuchsia).

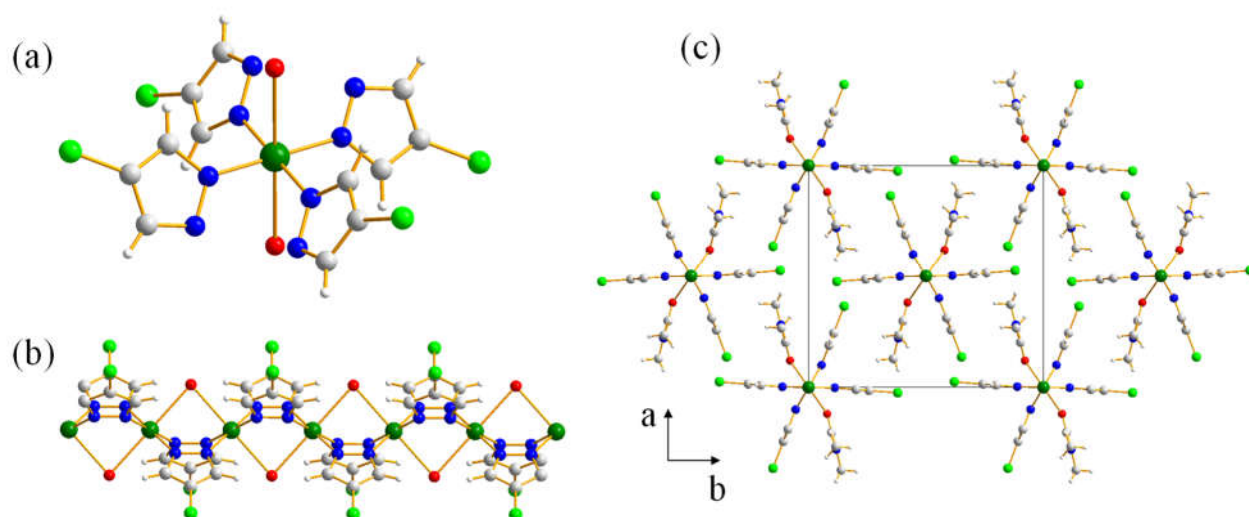

**Figure S5.** (a) Representation of the *trans*-CuN<sub>4</sub>O<sub>2</sub> octahedral stereochemistry of the copper(II) ion in **3DMF**. (b) Representation of portion of the 1-D helix of collinear metal ions running along the [001] crystallographic direction in **3DMF**. (c) Representation of portion of the crystal packing of **3DMF** viewed along the [001] crystallographic direction. Colour code: Carbon, grey; hydrogen, light grey; chlorine, light green; copper, green; nitrogen, blue; oxygen, red. Main bond distances (Å) and angles (°) at the metal ion: Cu-N 1.923(8), 1.953(9); Cu-O 2.681(9); intra-chain Cu...Cu 3.5692(1); N-Cu-N 89.50(23), 90.50(23), 180; O-Cu-O 180; N-Cu-O 82.99(30)-97.01(30).

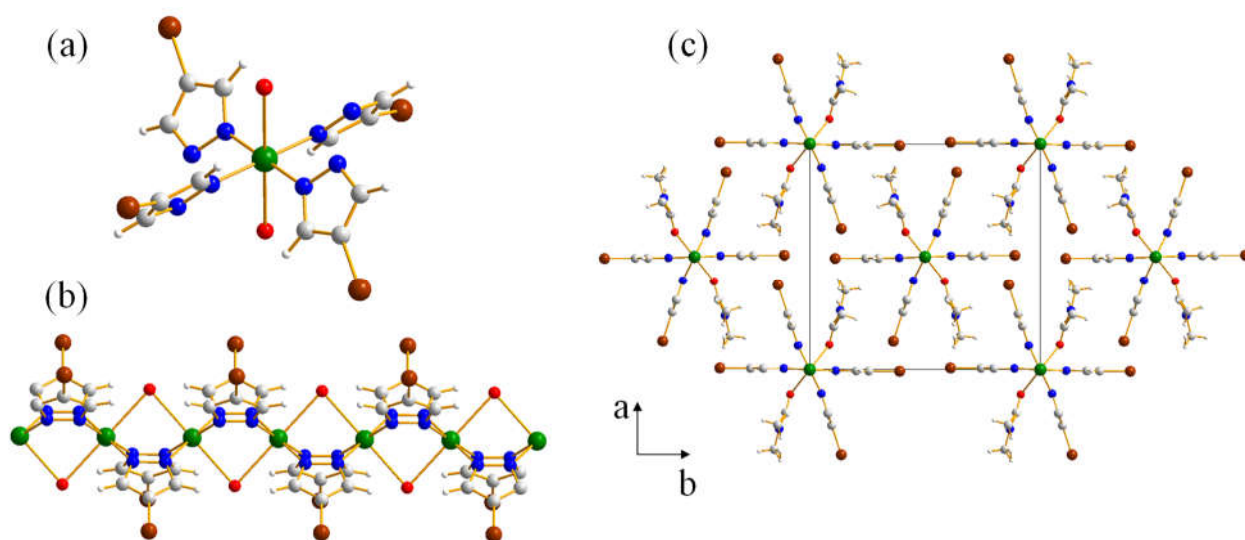

**Figure S6.** (a) Representation of the *trans*-CuN<sub>4</sub>O<sub>2</sub> octahedral stereochemistry of the copper(II) ion in **4DMF**. (b) Representation of portion of the 1-D helix of collinear metal ions running along the [001] crystallographic direction in **4DMF**. (c) Representation of portion of the crystal packing of **4DMF** viewed along the [001] crystallographic direction. Colour code: Carbon, grey; hydrogen, light grey; bromine, brown; copper, green; nitrogen, blue; oxygen, red. Main bond distances (Å) and angles (°) at the metal ion: Cu-N 1.964(7), 1.999(6); Cu-O 2.656(7); intra-chain Cu...Cu 3.5639(1); N-Cu-N 89.23(16), 90.77(16), 180; O-Cu-O 180; N-Cu-O 84.10(23)-95.90(23).

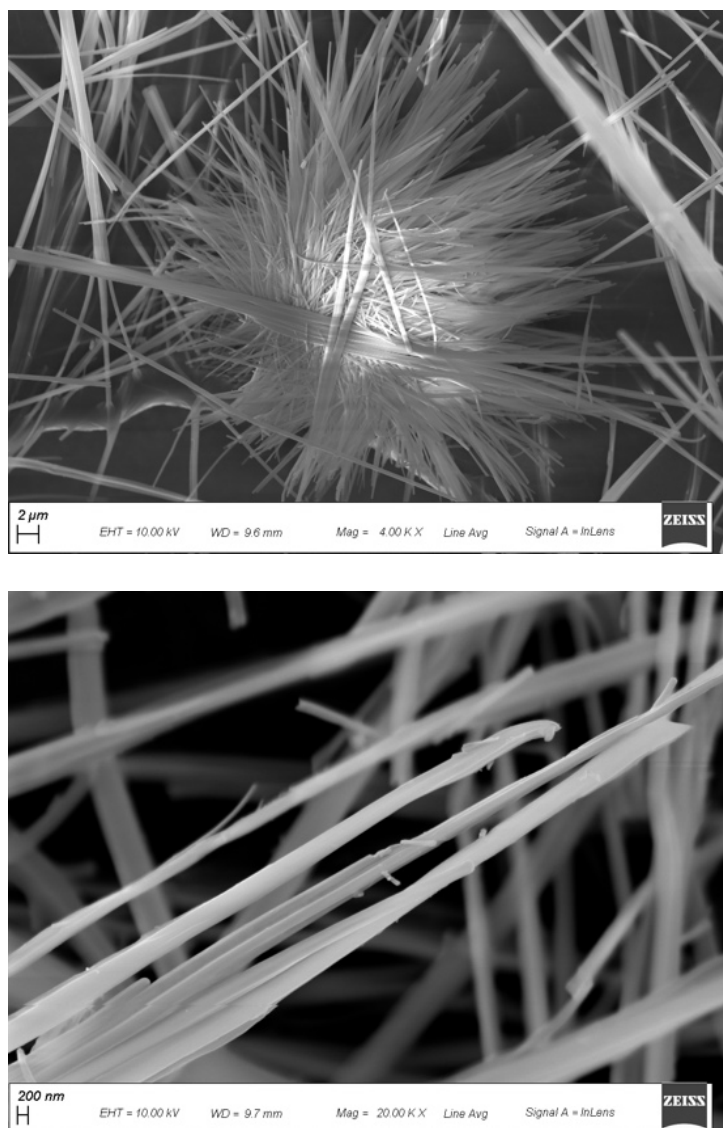

**Figure S7.** Scanning electron micrographs of a powdered batch of **2<sub>DMF</sub>**.



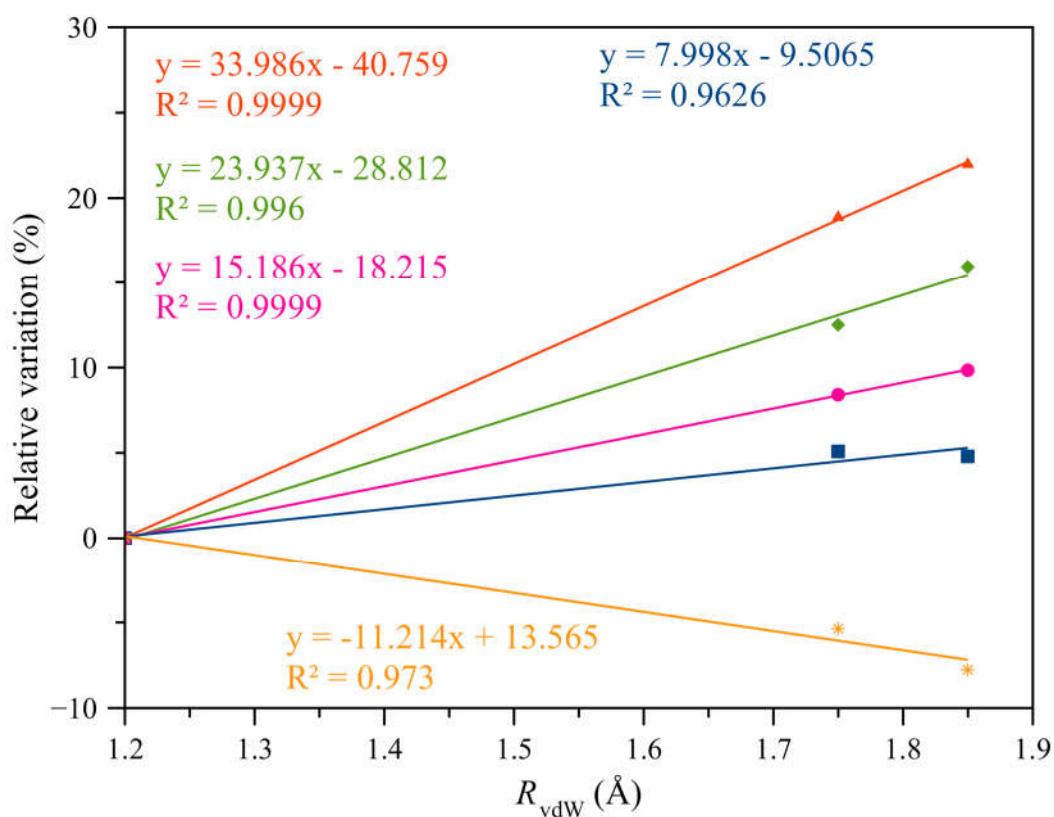

**Figure S8.** Percentage relative variation of the *a*- (green diamonds) and *b*-axis (blue squares), unit cell volume (red triangles), diagonal of the *C* face (fuchsia circles), atomic packing factor (orange stars) as a function of the van der Waals radii<sup>1</sup> ( $R_{\text{vdW}}$ ) of the atom in position 4 of the pyrazolate ligand in **2DMF-4DMF**. For the calculation of the atomic packing factor, see note *a* of Table S1.

**Table S1.** van der Waals radii<sup>1</sup> of the atom in position 4 of the pyrazolate ring ( $R_{\text{vdW}}$ ), unit cell parameters, edge of the rhombic motif ( $e_{\text{rhombi}}$ , half of the diagonal of the  $C$  face in **2DMF-4DMF**) defined by the reciprocal disposition of the 1-D helices (Figures 4, 5, S5 and S6), and atomic packing factor (APF) in **2DMF-5DMF**.

| Compound       | $R_{\text{vdW}}$ (Å) | $a$ (Å)    | $b$ (Å)    | $c$ (Å)   | $e_{\text{rhombi}}$ (Å) | APF <sup>a</sup> |
|----------------|----------------------|------------|------------|-----------|-------------------------|------------------|
| <b>2DMF</b>    | 1.20                 | 12.1799(5) | 13.7527(6) | 7.0999(4) | 9.1854(5)               | 0.97             |
| <b>3DMF</b>    | 1.75                 | 13.7038(3) | 14.4516(3) | 7.1384(2) | 9.9580(3)               | 0.92             |
| <b>4DMF</b>    | 1.85                 | 14.1228(4) | 14.4113(3) | 7.1279(2) | 10.0888(3)              | 0.89             |
| <b>oC-5DMF</b> | 1.98                 | 20.2680(5) | 9.5313(2)  | 7.3586(1) | 11.1986(3)              | 0.91             |
| <b>oP-5DMF</b> | 1.98                 | 20.1715(4) | 9.2333(2)  | 7.2913(1) | 11.0922(2)              | 0.82             |

<sup>a</sup> The atomic packing factor has been estimated as the ratio  $V(\text{atoms in the unit cell})/V(\text{unit cell})$ , neglecting the contribution of the hydrogen atoms and assigning, to the other atoms, an average volume of  $18 \text{ Å}^3$ .<sup>2</sup>

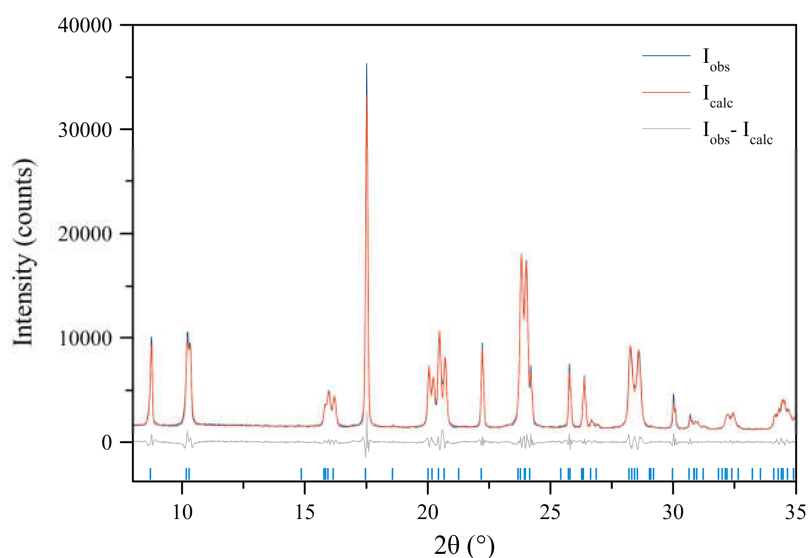

**Figure S9.** Graphical result of the whole powder pattern refinement carried out with the Le Bail approach on the PXRD pattern of the monoclinic phase of **5DMF** (**m-5DMF**). Experimental, calculated and difference profiles: blue, red and grey, respectively. Peak maxima positions: blue ticks.  $R_p = 4.01$ ;  $R_{wp} = 5.26$ .

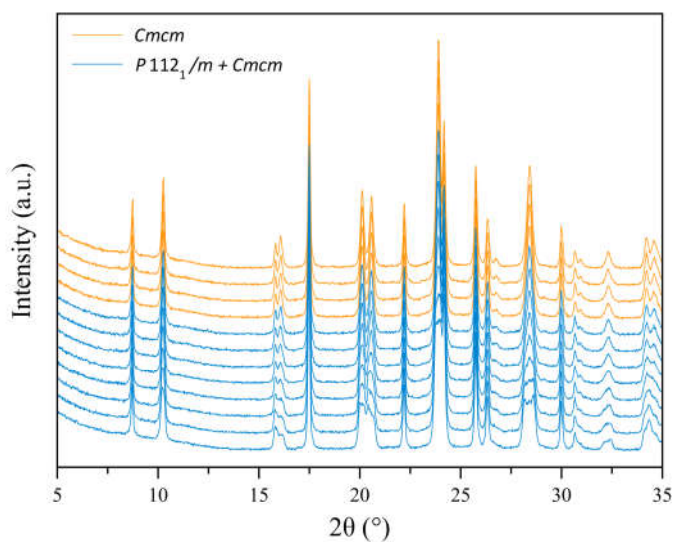

**Figure S10.** PXRD patterns acquired, as a function of time, starting from a sample of **5DMF** which is a mixture of monoclinic *P* (**m-5DMF**) and orthorhombic *C* (**oC-5DMF**) phases. Blue patterns: mixture of the two phases; orange patterns: orthorhombic *C* phase.

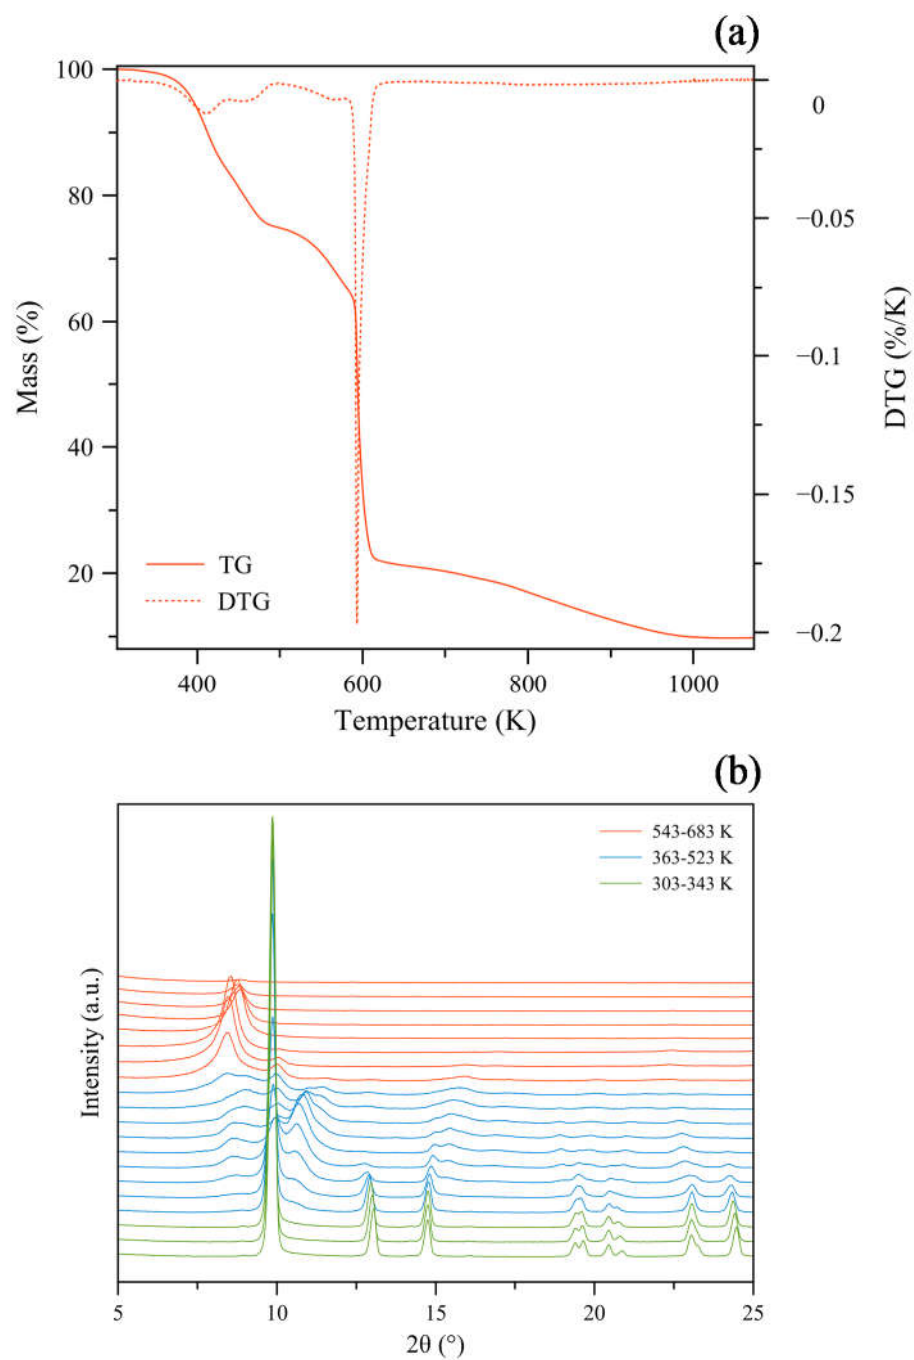

**Figure S11.** (a) TGA trace (red continuous line) measured under a flow of N<sub>2</sub> on **2DMF** and the corresponding DTG trace (red dashed line). (b) Powder X-ray diffraction patterns acquired on **2DMF** as a function of the temperature in the temperature range 303-683 K, with steps of 20 K.

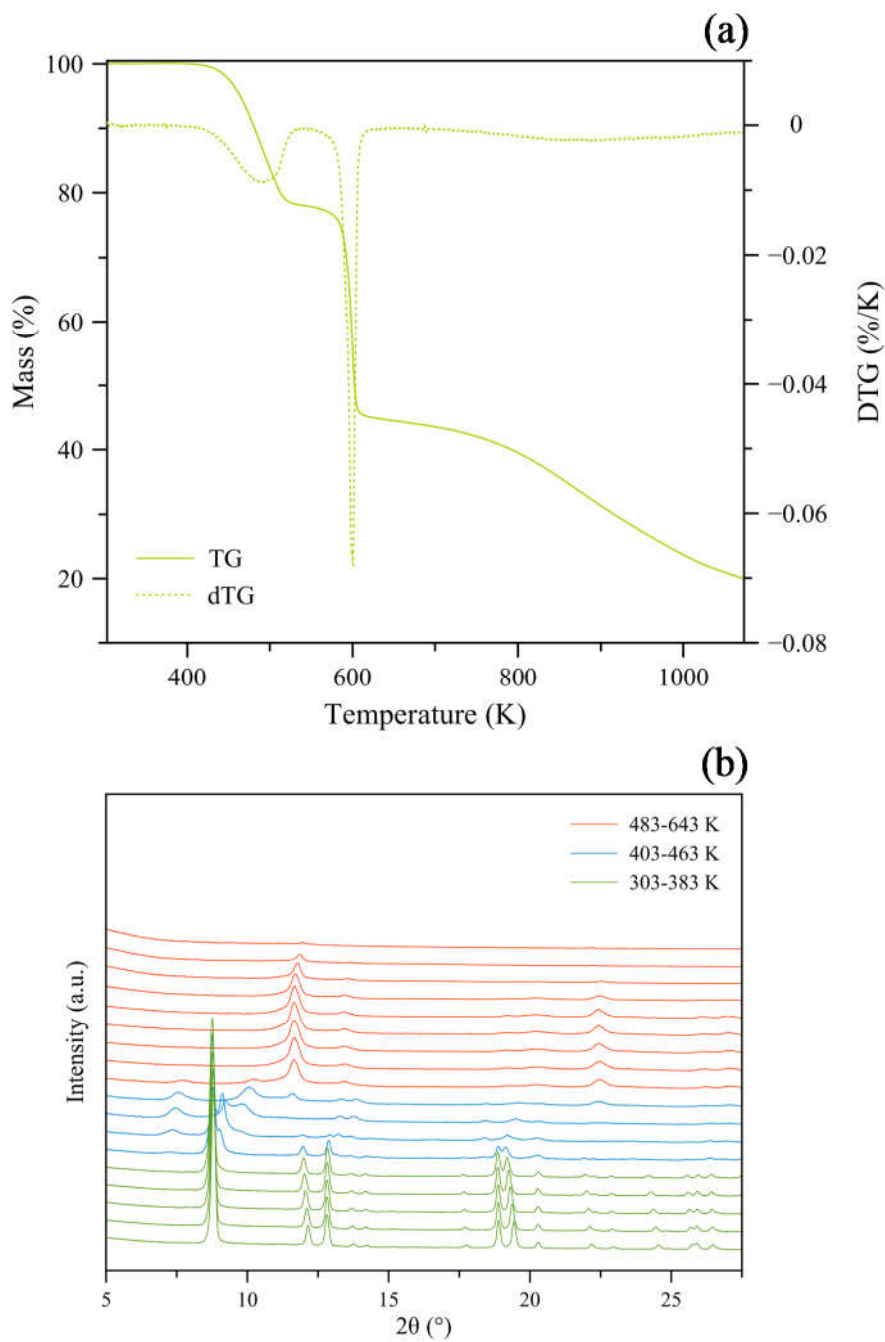

**Figure S12.** (a) TGA trace (green continuous line) measured under a flow of N<sub>2</sub> on **3DMF** and the corresponding DTG trace (green dashed line). (b) Powder X-ray diffraction patterns acquired on **3DMF** as a function of the temperature in the temperature range 303-643 K, with steps of 20 K.

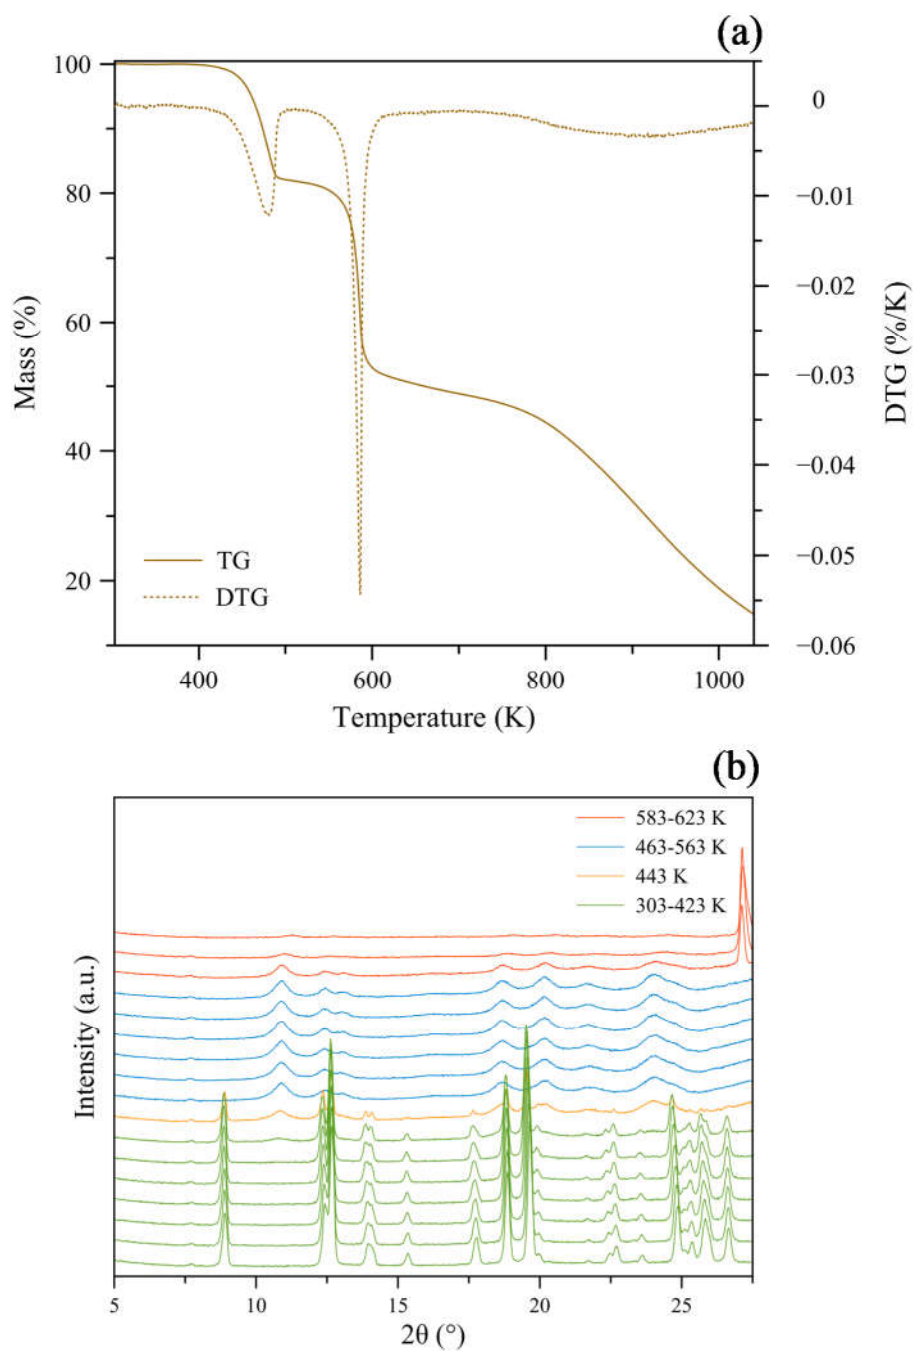

**Figure S13.** (a) TGA trace (brown continuous line) measured under a flow of  $N_2$  on **4DMF** and the corresponding DTG trace (brown dashed line). (b) Powder X-ray diffraction patterns acquired on **4DMF** as a function of the temperature in the temperature range 303-623 K, with steps of 20 K.

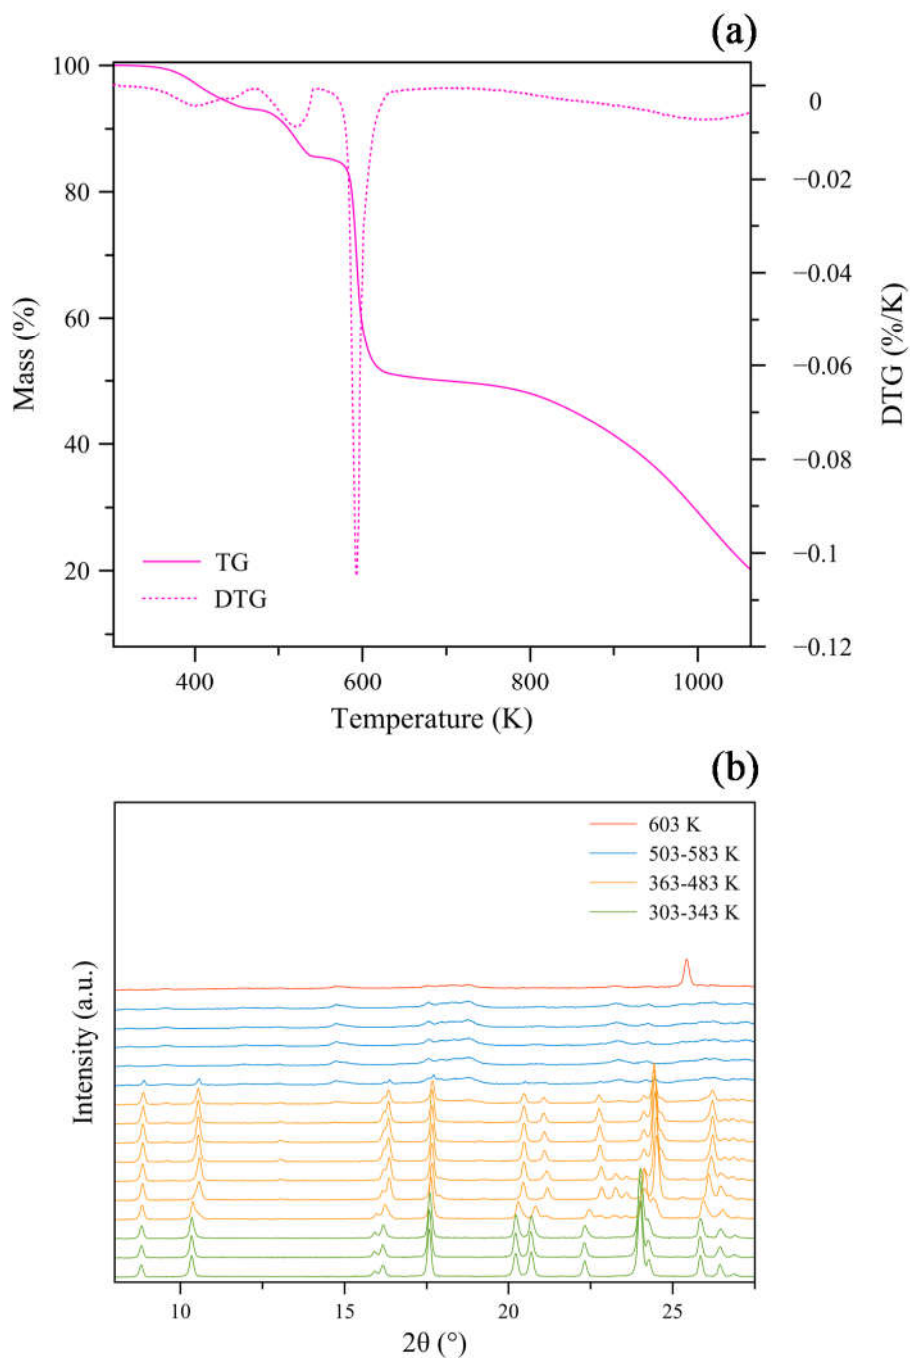

**Figure S14.** (a) TGA trace (purple continuous line) measured under a flow of  $\text{N}_2$  on **5DMF** and the corresponding DTG trace (purple dashed line). (b) Powder X-ray diffraction patterns acquired on **5DMF** as a function of the temperature in the temperature range 303-603 K, with steps of 20 K.

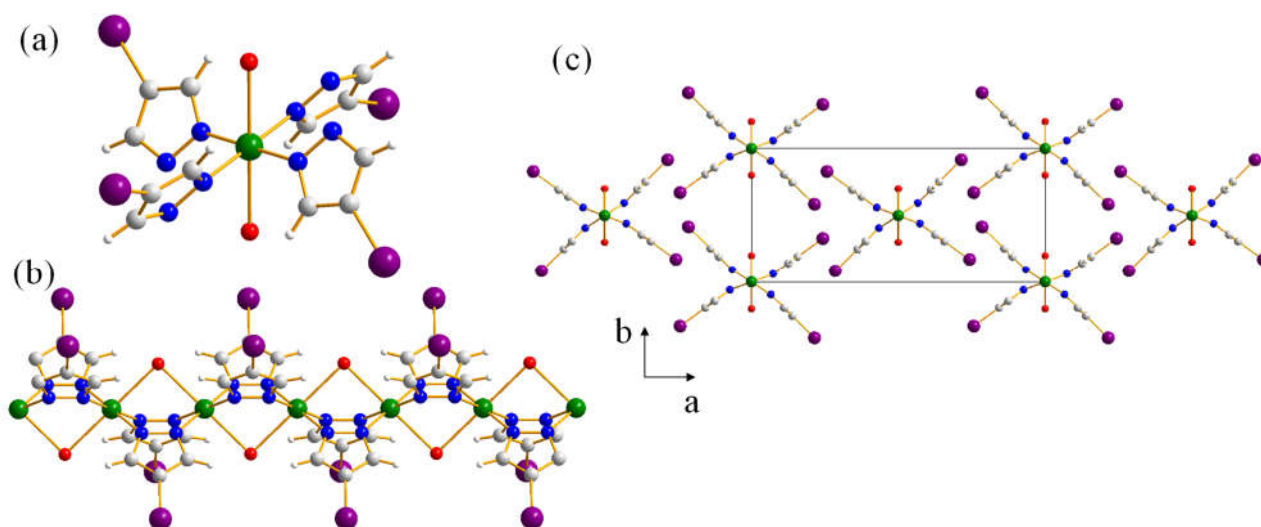

**Figure S15.** (a) Representation of the *trans*-CuN<sub>4</sub>O<sub>2</sub> octahedral stereochemistry of the copper(II) ion in **oP-5DMF**. (b) Representation of portion of the 1-D helix of collinear metal ions running along the [001] crystallographic direction in **oP-5DMF**. (c) Representation of portion of the crystal packing of **oP-5DMF** viewed along the [001] crystallographic direction. Horizontal axis, *a*; vertical axis *b*. Only the oxygen atoms of the DMF molecules have been depicted for clarity. Colour code: Carbon, grey; hydrogen, light grey; copper, green; iodine, violet; nitrogen, blue; oxygen, red. Main bond distances (Å) and angles (°) at the metal ion: Cu-N 1.9506(76), 1.9529(72); Cu-O 2.597(15); intra-chain Cu...Cu 3.6456(1); N-Cu-N 180; O-Cu-O 180; N-Cu-O 77.77(24) - 102.23(24).

**Table S2.** Optimized unit cell parameters computed at the B3LYP-D\* level for the low-spin state compounds **1-oC-5DMF**. Percentages in parenthesis is % Δ*V* with respect to the experimental value.

|                            | <b>1</b>    | <b>2<sub>DMF</sub></b> | <b>3<sub>DMF</sub></b> | <b>4<sub>DMF</sub></b> | <b>oC-5DMF</b> |
|----------------------------|-------------|------------------------|------------------------|------------------------|----------------|
| <i>a</i> (Å)               | 17.7609     | 11.9212                | 13.5388                | 13.9300                | 18.7006        |
| <i>b</i> (Å)               | 6.7896      | 12.9050                | 13.6471                | 13.8518                | 9.3850         |
| <i>c</i> (Å)               | 6.5909      | 7.05378                | 7.04702                | 7.05687                | 7.5452         |
| <i>V</i> (Å <sup>3</sup> ) | 793.4 (-9%) | 1085.1 (-9%)           | 1302.1 (-              | 1361.7 (-6%)           | 1324.2 (-7%)   |



**Table S3.** Optimized unit cell parameters computed at the B3LYP-D\* level for the high-spin state compounds **1-oC-5<sub>DMF</sub>**. Percentages in parenthesis is %  $\Delta V$  with respect to the experimental value.

|                            | <b>1</b>    | <b>2<sub>DMF</sub></b> | <b>3<sub>DMF</sub></b> | <b>4<sub>DMF</sub></b> | <b>oC-5<sub>DMF</sub></b> |
|----------------------------|-------------|------------------------|------------------------|------------------------|---------------------------|
| <i>a</i> (Å)               | 17.73575    | 11.99516               | 13.53887               | 13.93007               | 18.4346                   |
| <i>b</i> (Å)               | 6.79271     | 12.79345               | 13.64717               | 13.85183               | 9.2473                    |
| <i>c</i> (Å)               | 6.55168     | 7.12789                | 7.047021               | 7.05687                | 7.5566                    |
| $\gamma$ (°)               | 90.0        | 90.0                   | 90.0                   | 90.0                   | 87.9                      |
| <i>V</i> (Å <sup>3</sup> ) | 789.3 (-9%) | 1093.8 (-8%)           | 1302.1 (-              | 1361.7 (-6%)           | 1286.4(-                  |

**Table S4.** Optimized unit cell parameters computed at the PBE level for the high-spin state compounds **1-oC-5<sub>DMF</sub>**. Percentages in parenthesis is %  $\Delta V$  with respect to the experimental value.

|                            | <b>1</b> | <b>2<sub>DMF</sub></b> | <b>3<sub>DMF</sub></b> | <b>4<sub>DMF</sub></b> | <b>oC-5<sub>DMF</sub></b> |
|----------------------------|----------|------------------------|------------------------|------------------------|---------------------------|
| <i>a</i> (Å)               | 18.29387 | 12.8687                | 13.2282                | 14.86124               | 18.4792                   |
| <i>b</i> (Å)               | 6.8668   | 14.25077               | 16.42888               | 14.83259               | 10.0752                   |
| <i>c</i> (Å)               | 8.15015  | 7.28236                | 7.28364                | 7.2509                 | 7.8170                    |
| $\gamma$ (°)               | 90.0     | 90.0                   | 90.0                   | 90.0                   | 90.2                      |
| <i>V</i> (Å <sup>3</sup> ) | 1023.8   | 1335.5 (+12%)          | 1582.9                 | 1598.3                 | 1455.4                    |

**Table S5.** Optimized unit cell parameters computed at the B3LYP-D\* level for the hypothetical compounds **3<sub>CALC</sub>-5<sub>CALC</sub>**. Percentages in parenthesis refer to variations with respect to the corresponding compounds **3<sub>DMF</sub>-5<sub>DMF</sub>**.

|                            | <b>3<sub>CALC</sub></b> | <b>4<sub>CALC</sub></b> | <b>5<sub>CALC</sub></b> |
|----------------------------|-------------------------|-------------------------|-------------------------|
| <i>a</i> (Å)               | 7.0799 (-               | 7.502 (-47%)            | 20.4477                 |
| <i>b</i> (Å)               | 15.256                  | 15.000 (+8%)            | 6.6439 (-               |
| <i>c</i> (Å)               | 7.5970 (+8%)            | 7.7445                  | 7.7553 (≈               |
| $\beta$ (°)                | 90.0                    | 90.0                    | 100.5                   |
| <i>V</i> (Å <sup>3</sup> ) | 820.6 (-40%)            | 871.5 (-36%)            | 1035.8 (-               |

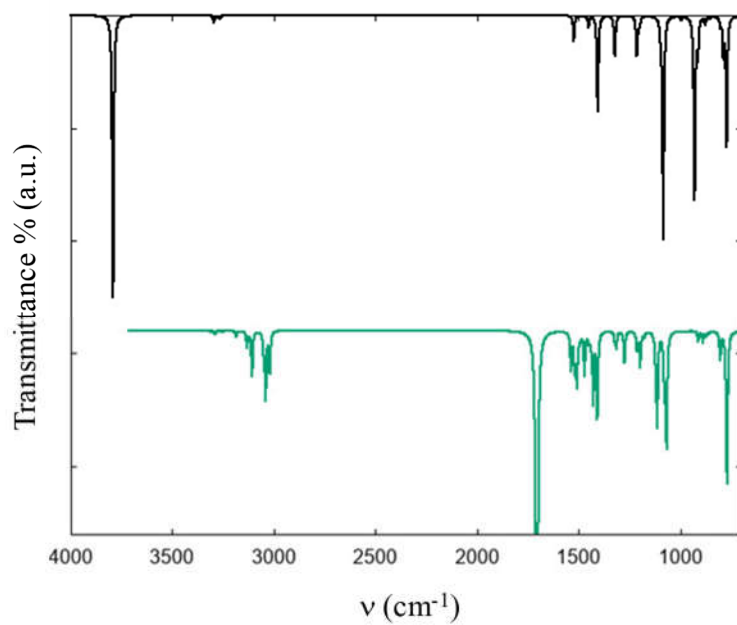

**Figure S16.** Computed IR spectra of  $[\text{Cu}(\mu\text{-pz})(\mu\text{-OH})]_n$  (**1**, black) and  $[\text{Cu}(\mu\text{-pz})_2(\mu\text{-DMF})]_n$  (**2**<sub>DMF</sub>, green).

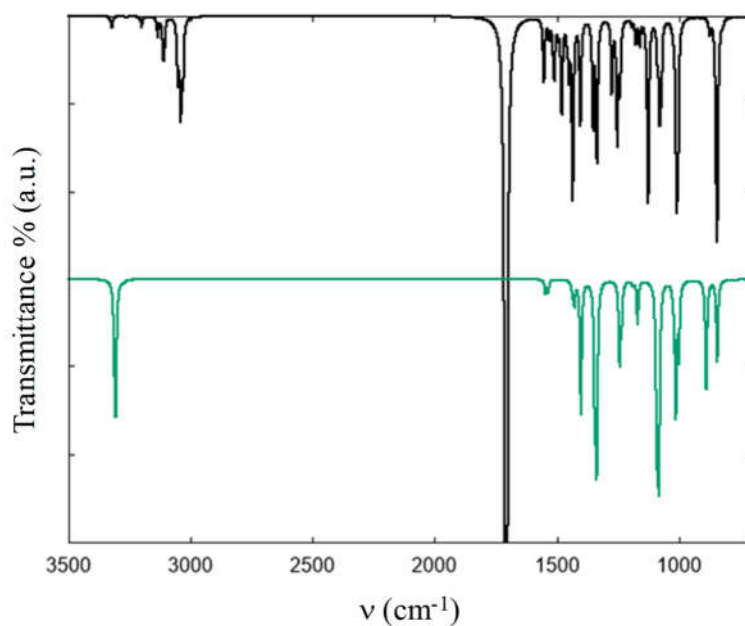

**Figure S17.** Computed IR spectra of  $[\text{Cu}(\mu\text{-4-Clpz})_2(\mu\text{-DMF})]_n$  (**3**<sub>DMF</sub>, black) and  $[\text{Cu}(\mu\text{-4-Clpz})_2]_n$  (**3**<sub>CALC</sub>, green).

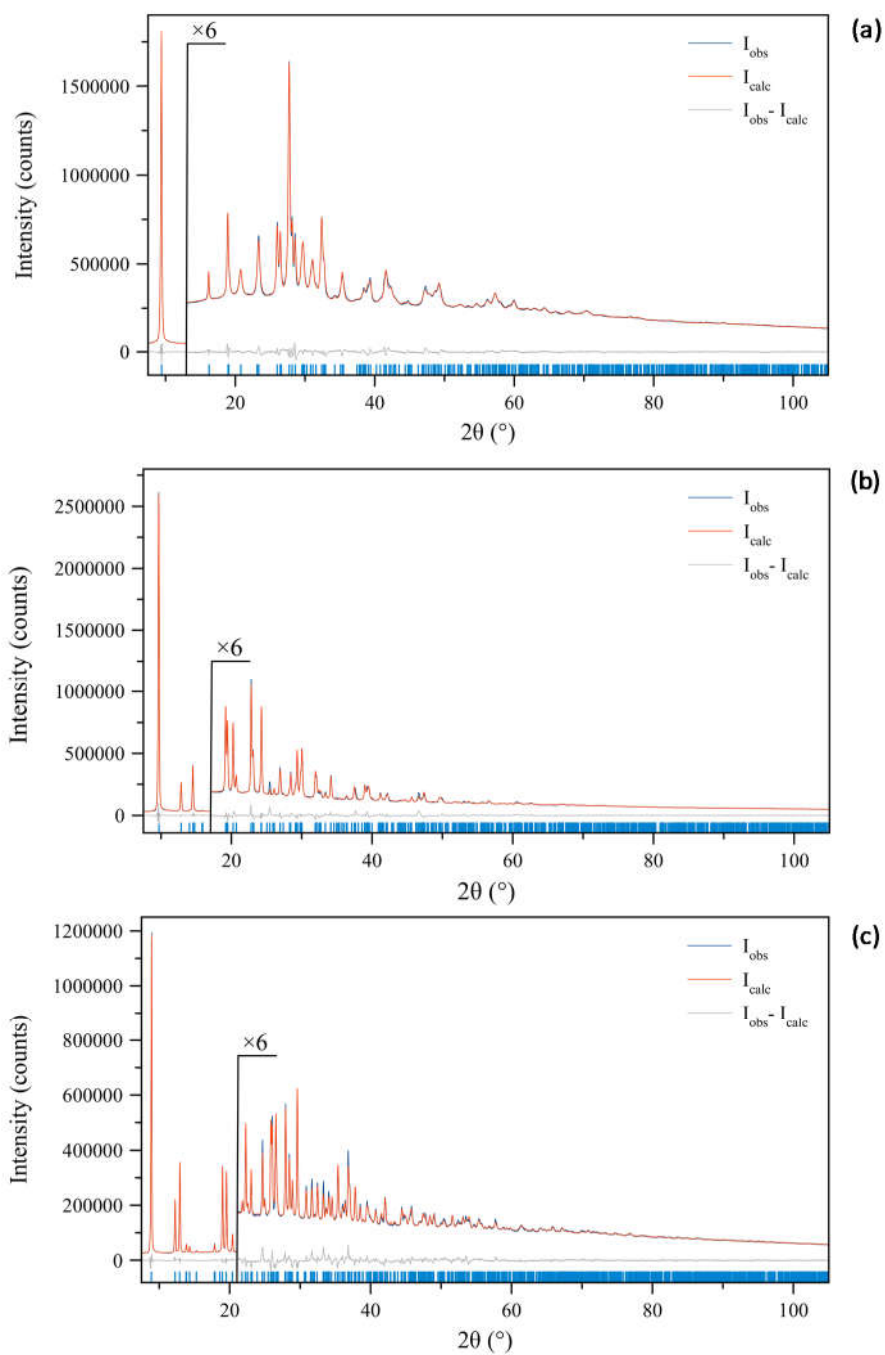

**Figure S18.** Graphical result of the final Rietveld refinements carried out on (a) **1**, (b) **2<sub>DMF</sub>** and (c) **3<sub>DMF</sub>** in terms of experimental, calculated and difference traces (blue, red and grey, respectively). The blue markers at the bottom indicate the positions of the Bragg reflections. Horizontal axis,  $2\theta$  (deg); vertical axis, intensity (counts).

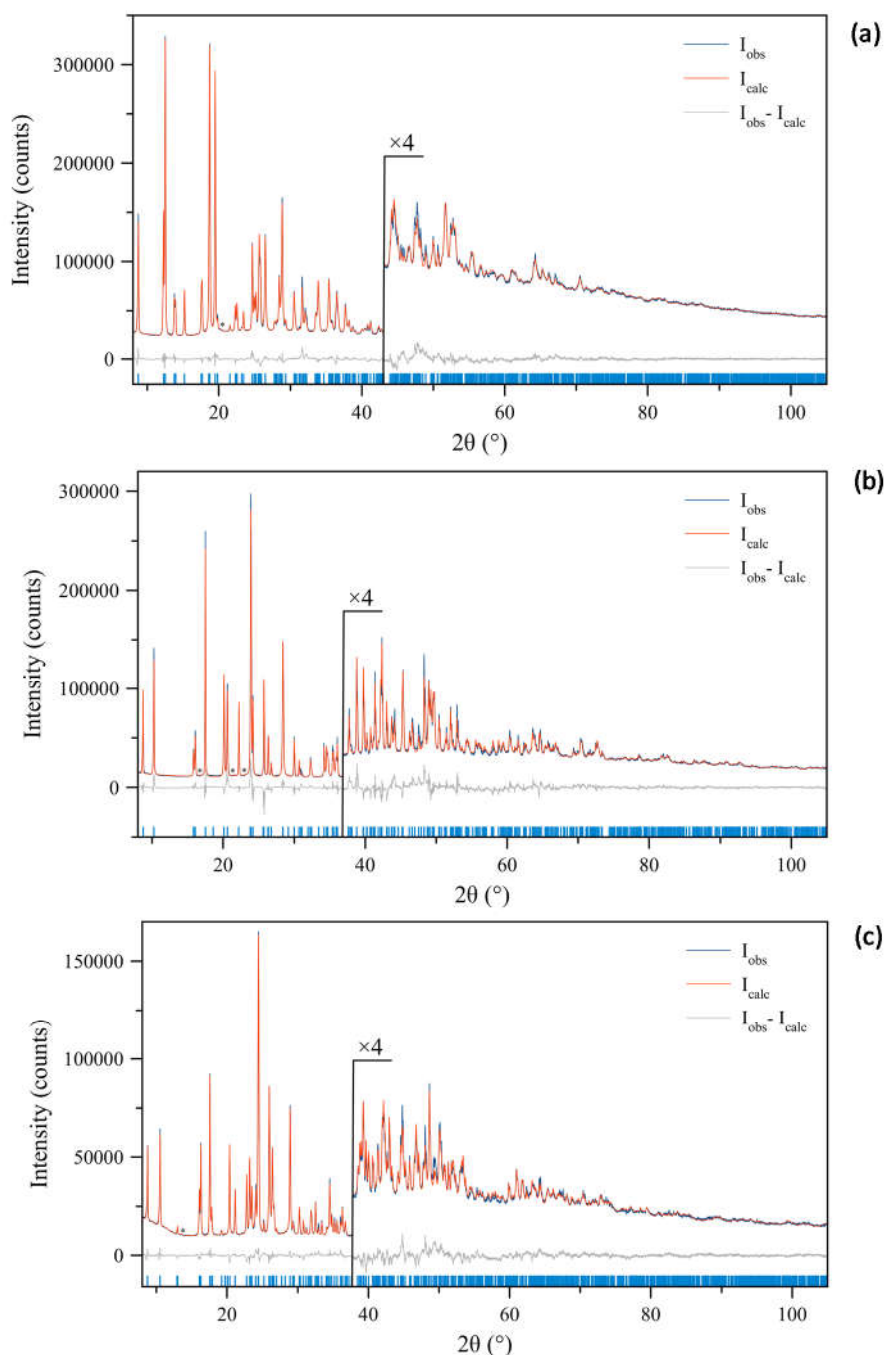

**Figure S19.** Graphical result of the final Rietveld refinements carried out on (a) **4DMF**, (b) **oC-5DMF** and (c) **oP-5DMF** in terms of experimental, calculated and difference traces (blue, red and grey, respectively). The blue markers at the bottom indicate the positions of the Bragg reflections. Horizontal axis,  $2\theta$  (deg); vertical axis, intensity (counts). The asterisks indicate peaks belonging to impurities.

## References

---

<sup>1</sup> A. Bondi, J. Phys.Chem. 1964, 68, 3, 441–451.

<sup>2</sup> C. J. E. Kempster and H. Lipson, Acta Cryst., 1972, B28, 3674.
